# Supplementary material for: Synthesis and electrochemical properties of conducting polyaniline/graphene hybrids by click chemistry
Source: Royal Society of Chemistry journal article supplement (doi:10.1039/c4ra03275f), 2014-01-01
Supplement: c4ra03275f1.pdf [file c4ra03275f1.pdf]

## Supporting Information

### Synthesis and electrochemical properties of conducting polyaniline/graphene oxide hybrids prepared by click chemistry

Madeshwaran Sekkarapatti Ramasamy, Sibdas Singha Mahapatra, Dong Hun Yi,

Hye Jin Yoo and Jae Whan Cho\*

*Department of Organic and Nano System Engineering, Konkuk University, Seoul 143-701,*

*Republic of Korea*

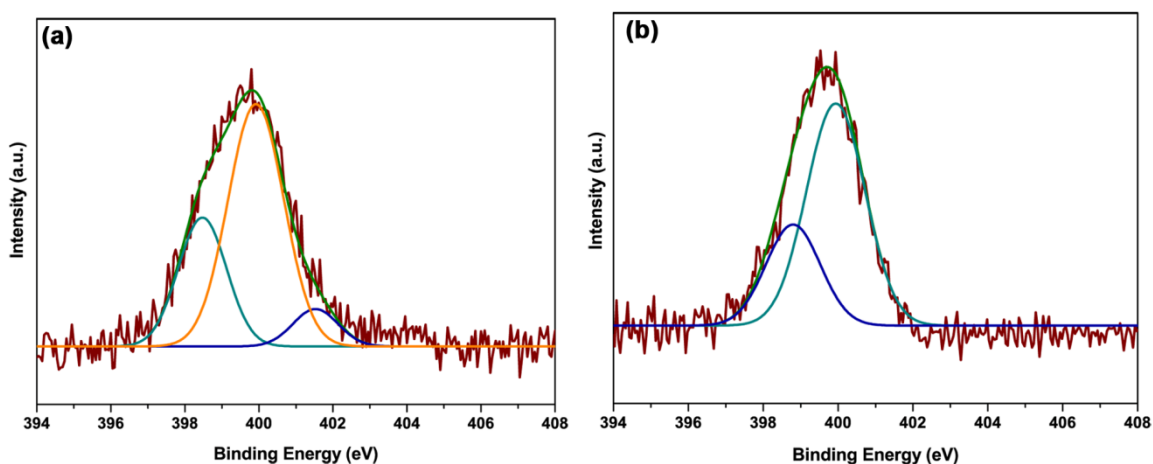

**Fig. S1** N 1s XPS spectra of (a) GO-N<sub>3</sub> and (b) GO-f-aniline.

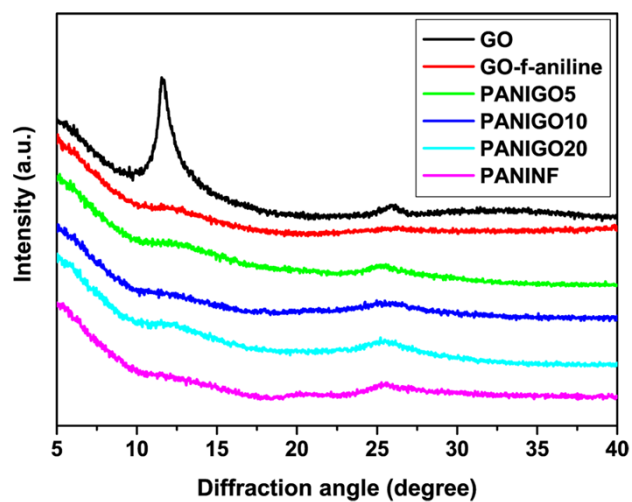

**Fig. S2** X-ray diffraction (XRD) pattern of GO, PANINF, GO-f-aniline and PANIGO composites.

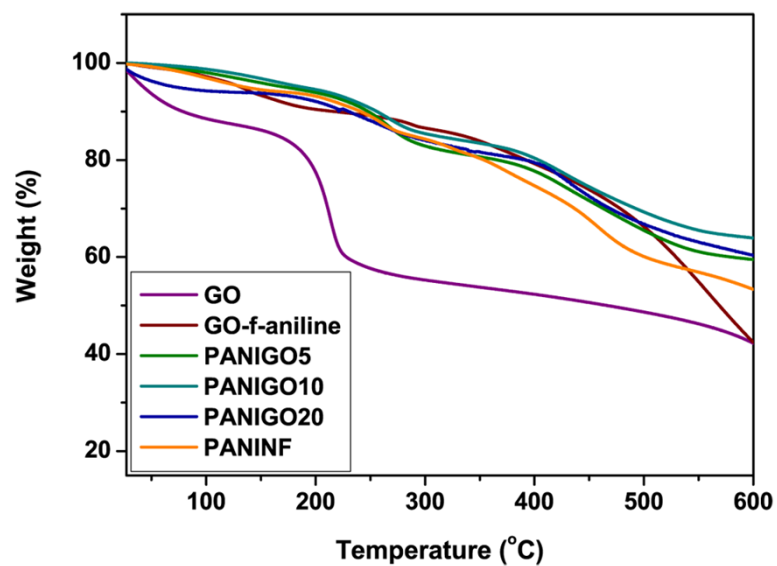

**Fig. S3** Thermogravimetric curves of GO, GO-f-aniline, PANIGO5, PANIGO10, PANIGO20, and PANINFs.

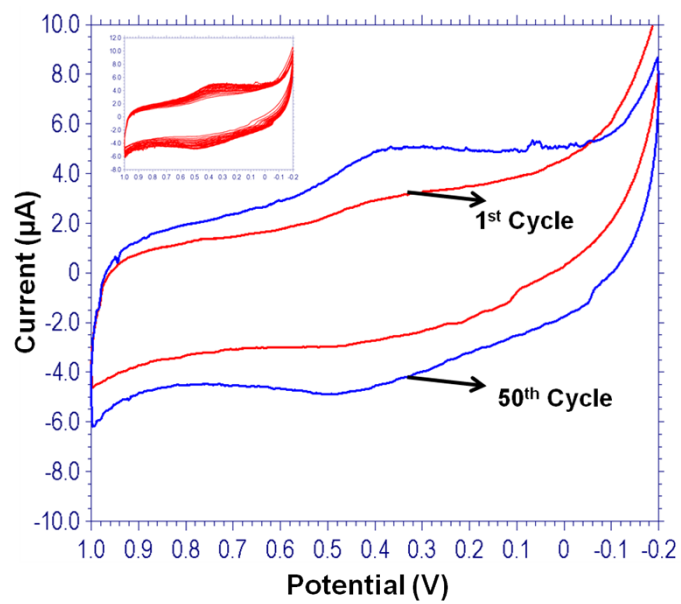

**Fig. S4** The cyclic voltammograms of GO for different cycle number.
